# Supplementary material
Source: publisher figshare collection journal article supplement (https://acs.figshare.com/ndownloader/files/31286108)
Supplement: Supplementary file 1 [file 31286108]

# **An Integrated Database of Common Chemicals and Chemistry Demonstrations and Student Experiments Used in Hungary**

**Lajos Kovács,<sup>\*a,d</sup> Gábor Betyár<sup>b,d</sup> and Erzsébet Korom<sup>c,d</sup>**

- a. University of Szeged, Szent-Györgyi Albert Medical School, Department of Medicinal Chemistry. Dóm tér 8, H6720 Szeged, Hungary. E-mail: [kovacs.lajos@med.u-szeged.hu](mailto:kovacs.lajos@med.u-szeged.hu)
- b. Center for Research on Learning and Instruction. Petőfi sgt. 32-34. H-6722 Szeged, Hungary
- c. University of Szeged, Department of Learning and Instruction. Petőfi sgt. 32-34. H-6722 Szeged, Hungary
- d. MTA-SZTE Science Education Research Group. Petőfi sgt. 32-34. H-6722 Szeged, Hungary

## **Supporting Information 3**

The image of a pdf report generated for an experiment in the **Experiments** subdatabase

Title  
(The pink catalyst 2)

A rózsaszínű katalizátor 2.

Chemical safety level

A kísérletek veszélyességi szintje:

CSL2

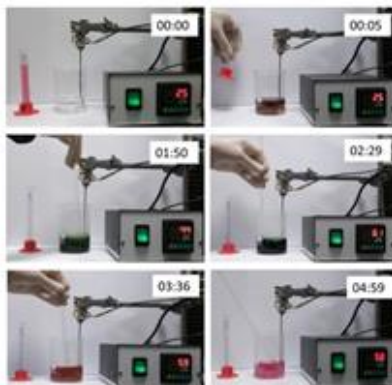

Reasoning  
skills

- Gondolkodási képességek:
- kombinatív, oksági gondolkodás, összehasonlítás

Substance  
groups

- Anyagcsoportok:
- [hidrogén és vegyületei](#)
- [oxigéncsoport elemei és vegyületeik](#)
- [átmeneti fémek és vegyületeik](#)
- [karbonsavak sói](#)
- Fogalmak, jelenségek:
- [Reakciókinetika és egyensúlyok](#)
  - [katalízis](#)
- [A kémiai reakciók](#)
  - [redoxireakciók](#)

Concepts,  
phenomena

- Szükséges eszközök:
- védőszemüveg, spatula, főzőpohár, mérőhenger, hőmérő
- Szükséges alapanyagok és összetevőik
- [nátrium-hidrogénkarbonát](#)
- Összetevők: [nátrium-hidrogénkarbonát](#)
- [hidrogén-peroxid](#)
- Összetevők: [hidrogén-peroxid](#), [víz](#)
- [kálium-nátrium-tartarát](#)
- Összetevők: [kálium-nátrium-tartarát](#)

Required  
equipment

Required  
substances and  
components

|                                         |                                                                                                                                                                                                                                                                                                                                                                                                                                                                                                                                                                                                                                                                                                                                                                                                                                                                                                                                                                                |
|-----------------------------------------|--------------------------------------------------------------------------------------------------------------------------------------------------------------------------------------------------------------------------------------------------------------------------------------------------------------------------------------------------------------------------------------------------------------------------------------------------------------------------------------------------------------------------------------------------------------------------------------------------------------------------------------------------------------------------------------------------------------------------------------------------------------------------------------------------------------------------------------------------------------------------------------------------------------------------------------------------------------------------------|
| Level (advanced)                        | • <b>Szint:</b> haladó                                                                                                                                                                                                                                                                                                                                                                                                                                                                                                                                                                                                                                                                                                                                                                                                                                                                                                                                                         |
| Short description                       | • <b>Leírása:</b> <i>Katalízis látványos színváltozással - egyszerűbben.</i>                                                                                                                                                                                                                                                                                                                                                                                                                                                                                                                                                                                                                                                                                                                                                                                                                                                                                                   |
| Materials                               | • <b>Anyagok:</b> 10 cm <sup>3</sup> 0,17 mol/dm <sup>3</sup> koncentrációjú kobalt(II)-klorid-oldat (1,7 mmol); 80 cm <sup>3</sup> 3(v/v)%-os hidrogén-peroxid-oldat (72 mmol); 9,9 g (35 mmol) kálium-nátrium-tartarát-tetrahidrát; 0,1 g (1 mmol) nátrium-hidrogénkarbonát.                                                                                                                                                                                                                                                                                                                                                                                                                                                                                                                                                                                                                                                                                                 |
| Equipment                               | • <b>Eszközök:</b> védőszemüveg; spatula; 250 cm <sup>3</sup> -es főzőpohár, üvegbot, 100 cm <sup>3</sup> -es mérőhenger; hőmérő.                                                                                                                                                                                                                                                                                                                                                                                                                                                                                                                                                                                                                                                                                                                                                                                                                                              |
| Description of experiment               | • <b>A kísérlet végrehajtása:</b> A kálium-nátrium-tartarátot oldjuk fel a hidrogén-peroxid-oldatban és öntsük a főzőpohárba, majd adjuk hozzá a nátrium-hidrogénkarbonátot és helyezzük a hőmérőt az oldatba. A kobalt(II)-klorid-oldatot öntsük a reakcióelegyhez. A reakció közben folyamatosan keverjük az elegyet.                                                                                                                                                                                                                                                                                                                                                                                                                                                                                                                                                                                                                                                        |
| Experience                              | • <b>Tapasztalat:</b> A hidrogén-peroxid-oldat és a kobalt-klorid katalizátor hozzáadását követően egy rövid indukciós periódus után heves gázfejlődést tapasztalunk a kezdetben rózsaszínű elegyben és az oldat színe zöld lesz, eközben a szobahőmérsékletű elegy hőmérséklete mintegy 55-60 °C-ra emelkedik. Amikor a reakció alábbhagy, az oldat ismét rózsaszínű lesz.                                                                                                                                                                                                                                                                                                                                                                                                                                                                                                                                                                                                    |
| Explanation                             | • <b>Magyarázat:</b> A hidrogén-peroxid a tartarátsókat glikolaldehiddé és szén-dioxiddá oxidálja, a kobalt(II)-ionok katalizátorként vesznek részt a reakcióban. A hidrogén-peroxid a kobalt(II)-ionokat kobalt(III)-ionokká oxidálja, ezek a tartarationokkal komplex ionokat képeznek, ezért látjuk a zöld színt. Ezek a komplex ionok katalizálják a hidrogén-peroxid bomlását is. Eközben a kobalt(III)-ionok visszaalakulnak kobalt(II)-ionokká, mint azt a rózsaszín szín is mutatja. Wright és Silverstein 2010-ben számos körülmény vizsgálata után leírta a reakció egyszerűsített, melegítést nem igénylő, autokatalitikus változatát is. Az autokatalízisben a hidrogén-karbonátnak játszanak szerepet. Ha túl sok a hidrogén-karbonát mennyisége, a reakció túl gyors és az indukciós periódus miatt egyáltalán nem látszik kezdetben a kobalt(II)-sók rózsaszíne. A reakció sztöchiometriája meglehetősen összetett a hidrogén-peroxid párhuzamos bomlása miatt. |
| Safety precautions and waste management | • <b>Biztonsági tudnivalók és hulladékkezelés:</b> Viseljünk védőszemüveget a kísérlet során. A reakcióelegyet folyamatosan keverjük. A szilárd és az oldott kobalt(II)-kloriddal kerüljük az érintkezést, mert rákkeltő. A hidrogénperoxid-oldat ilyen koncentrációban mérsékelten veszélyes. A kálium-nátrium-tartarát (Seignette-vagy Rochelle-só) ártalmatlan anyag. A kobalt(II)-sókat főlös vízüveggel vagy nátrium-szulfid-oldattal csapjuk le, a kiszűrt kobalt(II)-csapadékot veszélyes hulladékként tároljuk és csak ezután önthetjük a lefolyóba a visszamaradó reakcióelegyet!                                                                                                                                                                                                                                                                                                                                                                                     |
| Sources                                 | • <b>Források:</b><br>• <a href="#">Wright, S. W.; Silverstein, T. P., Improvements upon the "colorful cobalt catalysis" demonstration and evidence for the presence of an autocatalytic mechanism. J. Chem. Educ. (2010) 87, 1064-1069.</a>                                                                                                                                                                                                                                                                                                                                                                                                                                                                                                                                                                                                                                                                                                                                   |
| Video link                              | • <a href="http://edu.u-szeged.hu/ttkcs/vegyszer/">http://edu.u-szeged.hu/ttkcs/vegyszer/</a><br>• <b>Videólink:</b><br>• <a href="#">Pink catalyst (angol nyelvű videó)</a>                                                                                                                                                                                                                                                                                                                                                                                                                                                                                                                                                                                                                                                                                                                                                                                                   |
